# Supplementary material for: Tuneable single-molecule electronic conductance of C60by encapsulation
Source: Royal Society of Chemistry journal article supplement (doi:10.1039/c9cp02469g), 2019-01-01
Supplement: c9cp02469g1.pdf [file c9cp02469g1.pdf]

## Tunable Single-Molecule Electronic Conductance of C<sub>60</sub> by Encapsulation

Shintaro Fujii,\*<sup>a</sup> Haruna Cho,<sup>a</sup> Yoshifumi Hashikawa,<sup>b</sup> Tomoaki Nishino,<sup>a</sup> Yasujiro Murata\*<sup>b</sup> and Manabu Kiguchi\*<sup>a</sup>

<sup>a</sup>Department of Chemistry, Tokyo Institute of Technology, 2-12-1 W4-10 Ookayama, Meguro-ku, Tokyo 152-8511, Japan. E-mail: [fujii.s.af@m.titech.ac.jp](mailto:fujii.s.af@m.titech.ac.jp), [kiguhi@chem.titech.ac.jp](mailto:kiguhi@chem.titech.ac.jp); Tel: +81-3-5734-2610

<sup>b</sup>Institute for Chemical Research, Kyoto University, Uji, Kyoto 611-0011, Japan. E-mail: [yasujiro@scl.kyoto-u.ac.jp](mailto:yasujiro@scl.kyoto-u.ac.jp); Tel: +81-774-38-3172

### Table of Contents

1. Figure S1. Additional STM images
2. Figure S2. Two dimensional histograms of the conductance versus stretch distance traces
3. Figure S3 Conductance versus stretch distance trace
4. Figure S4. DFT-calculated density of states
5. Table S1-S3. Optimized structures

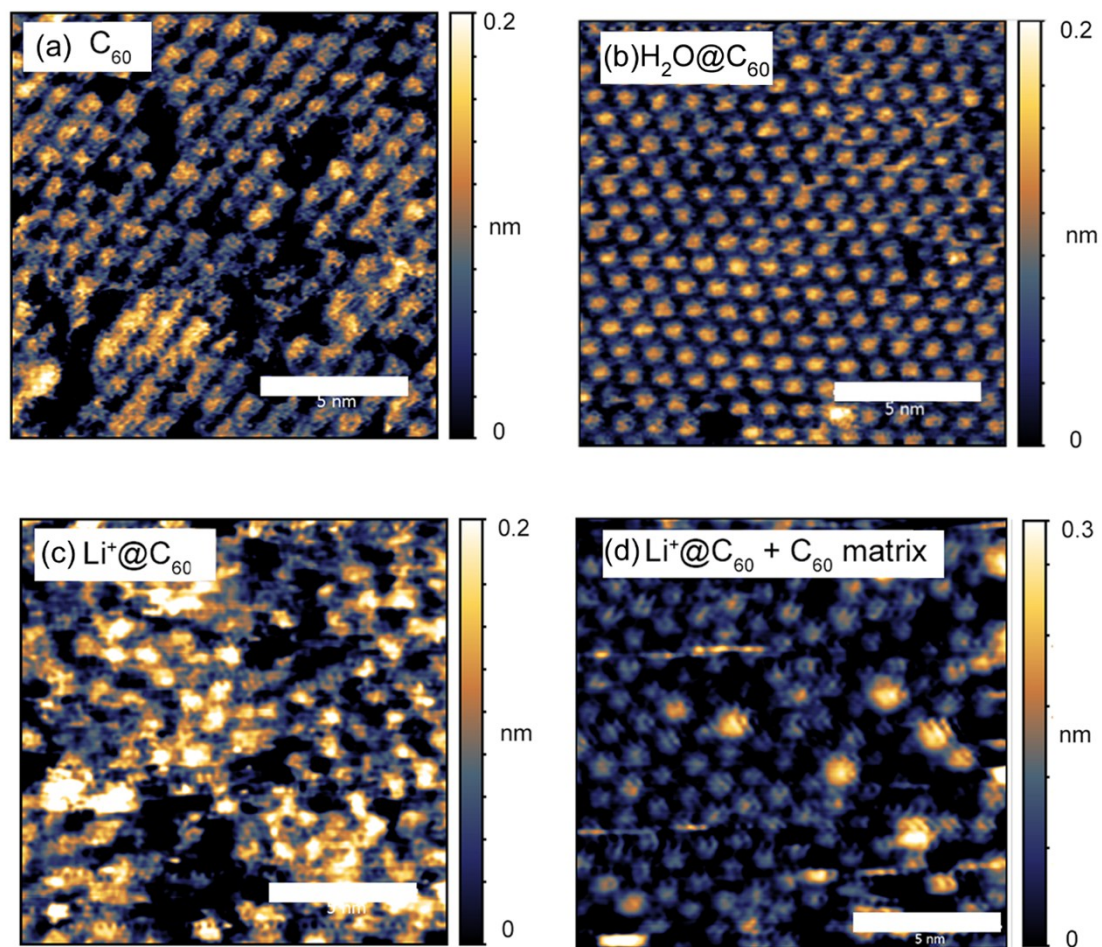

**Figure S1.** STM images of (a) C<sub>60</sub>, (b) H<sub>2</sub>O@C<sub>60</sub>, (c) Li<sup>+</sup>@C<sub>60</sub>, and (d) Li<sup>+</sup>@C<sub>60</sub> + C<sub>60</sub> matrix on Au(111) under ultrahigh vacuum conditions at room temperature using Au-STM tips — imaging condition: (a) tunnelling current ( $I_t$ ) = 0.3 nA and sample bias voltage ( $V_s$ ) = -0.1 V, (b)  $I_t$  = 0.2 nA and  $V_s$  = +0.2 V, (c)  $I_t$  = 0.3 nA and  $V_s$  = +0.1 V, and (d)  $I_t$  = 0.6 nA and  $V_s$  = -0.1 V

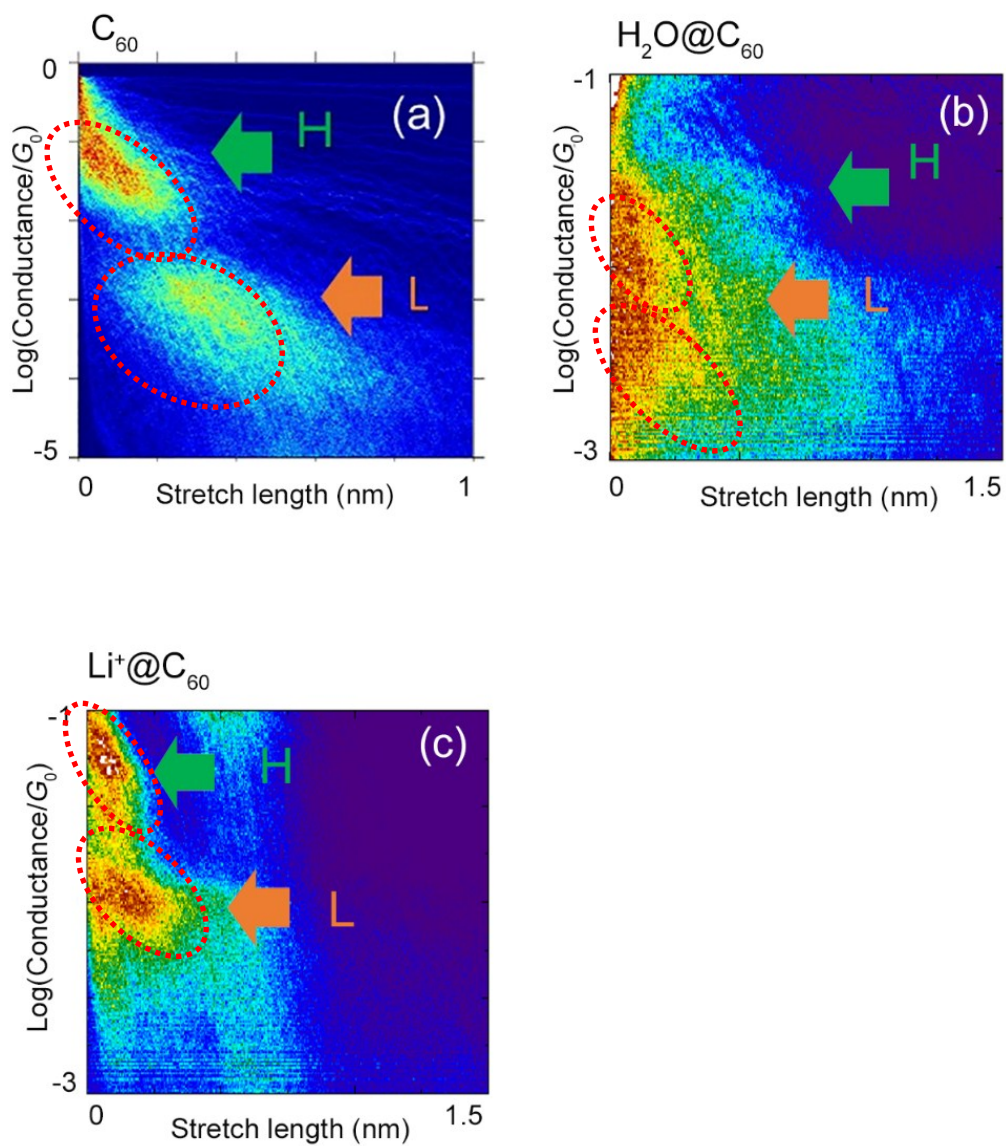

**Fig. S2** Two-dimensional (2D) histograms of conductance vs. stretch length traces for SMJs of (a)  $C_{60}$ , (b)  $H_2O@C_{60}$  and (c)  $Li^+@C_{60}$ . The histograms are made from the same data set used for the conductance histogram in Fig. 2. The histograms are constructed by identifying the first data point that has a conductance value lower than  $0.5 G_0$ , assigning it as a relative zero length  $L = 0$  for each trace, and then overlapping all of the individual traces in 2D space — the histogram of  $C_{60}$  in (a) was from a previous result<sup>[1]</sup> Dotted circles are guides for the eye, indicating the H and L distribution.

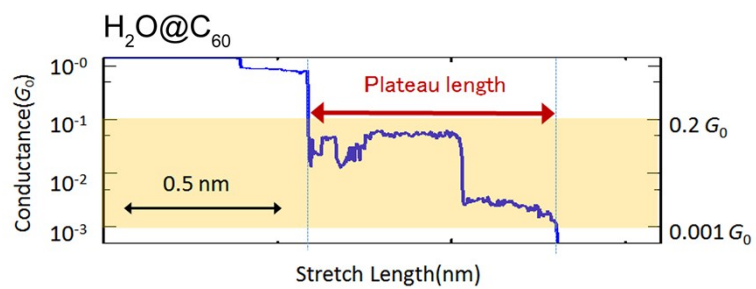

**Fig. S3** An example of the conductance *versus* stretch length trace for  $\text{H}_2\text{O}@\text{C}_{60}$ . The length of the junction is defined by the length of the conductance plateau within the conductance window from  $0.001 G_0$  to  $0.2 G_0$ .

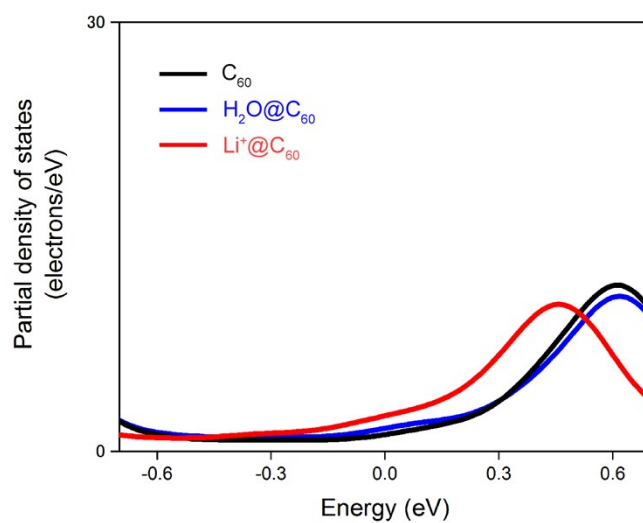

**Fig. S4** The calculated density of states projected onto atomic orbitals of the  $C_{60}$  molecule for  $C_{60}$  (black),  $H_2O@C_{60}$  (blue), and  $Li^+@C_{60}$  (red) on Au(111). DFT calculations were performed using the CASTEP program<sup>[2]</sup> and the Perdew–Burke–Ernzerhof (PBE) XC functional<sup>[3]</sup> with van der Waals corrections<sup>[4]</sup>. The Au(111) is modelled by a slab of five layers of (4×4) Au-hexagonal lattice on which each molecule is deposited. The layers are separated by vacuum of > 1 nm along the z-direction. The bottom two layers of the slabs are kept fixed, while all upper layers including the adlayers are fully relaxed. The electronic wave functions were expanded in a plane-wave basis set with a cutoff kinetic energy of 40 Ry. Brillouin-zone integration was performed using a uniform 2×2×1 Monkhorst-type k-point grid<sup>[5]</sup>.

**Table S1.** Optimized structure of C<sub>60</sub> (B3LYP-D3/6-31G(d,p))

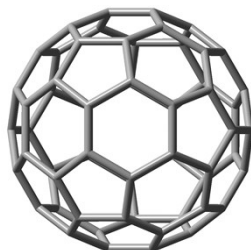

Standard orientation:

| Center Number | Atomic Number | Atomic Type | Coordinates (Angstroms) |           |           |
|---------------|---------------|-------------|-------------------------|-----------|-----------|
|               |               |             | X                       | Y         | Z         |
| 1             | 6             | 0           | 3.407680                | -0.728179 | -0.679370 |
| 2             | 6             | 0           | 2.790905                | -0.954231 | -1.976325 |
| 3             | 6             | 0           | 1.937872                | -2.042302 | -2.162857 |
| 4             | 6             | 0           | 1.665687                | -2.949649 | -1.060103 |
| 5             | 6             | 0           | 2.257844                | -2.733147 | 0.184234  |
| 6             | 6             | 0           | 3.146518                | -1.599405 | 0.378594  |
| 7             | 6             | 0           | 2.452230                | 0.340379  | -2.544381 |
| 8             | 6             | 0           | 0.710425                | -1.881642 | -2.925261 |
| 9             | 6             | 0           | 0.270799                | -3.350135 | -1.141506 |
| 10            | 6             | 0           | 1.480034                | -2.908081 | 1.400018  |
| 11            | 6             | 0           | 2.917504                | -1.072669 | 1.713985  |
| 12            | 6             | 0           | 3.450101                | 0.706106  | -0.446173 |
| 13            | 6             | 0           | 0.141035                | -3.291933 | 1.321732  |
| 14            | 6             | 0           | -0.475958               | -3.518146 | 0.024928  |
| 15            | 6             | 0           | -0.846390               | -2.666099 | 2.185797  |
| 16            | 6             | 0           | -1.844387               | -3.031553 | 0.087692  |
| 17            | 6             | 0           | 1.274553                | 0.494540  | -3.275986 |
| 18            | 6             | 0           | -0.319859               | -2.689986 | -2.294028 |
| 19            | 6             | 0           | -2.073715               | -2.505391 | 1.423320  |
| 20            | 6             | 0           | -1.633457               | -2.223925 | -2.234081 |
| 21            | 6             | 0           | 0.385814                | -0.639352 | -3.470610 |
| 22            | 6             | 0           | 1.887635                | -1.881298 | 2.345064  |

|    |   |   |           |           |           |
|----|---|---|-----------|-----------|-----------|
| 23 | 6 | 0 | 2.958829  | 0.303656  | 1.937891  |
| 24 | 6 | 0 | 0.455066  | 1.681231  | -3.093060 |
| 25 | 6 | 0 | 3.230481  | 1.211428  | 0.835463  |
| 26 | 6 | 0 | 2.860205  | 1.366533  | -1.598956 |
| 27 | 6 | 0 | 1.971575  | 0.929258  | 2.802391  |
| 28 | 6 | 0 | 2.411518  | 2.398406  | 1.018544  |
| 29 | 6 | 0 | 2.073715  | 2.505391  | -1.423320 |
| 30 | 6 | 0 | -2.411518 | -2.398406 | -1.018544 |
| 31 | 6 | 0 | 0.940040  | -1.280893 | 3.174404  |
| 32 | 6 | 0 | -0.982777 | -0.153355 | -3.407458 |
| 33 | 6 | 0 | 1.633457  | 2.223925  | 2.234081  |
| 34 | 6 | 0 | 1.844387  | 3.031553  | -0.087692 |
| 35 | 6 | 0 | 0.846390  | 2.666099  | -2.185797 |
| 36 | 6 | 0 | -0.141035 | 3.291933  | -1.321732 |
| 37 | 6 | 0 | -0.940040 | 1.280893  | -3.174404 |
| 38 | 6 | 0 | -1.971575 | -0.929258 | -2.802391 |
| 39 | 6 | 0 | -2.958829 | -0.303656 | -1.937891 |
| 40 | 6 | 0 | 0.475958  | 3.518146  | -0.024928 |
| 41 | 6 | 0 | -0.270799 | 3.350135  | 1.141506  |
| 42 | 6 | 0 | -1.665687 | 2.949649  | 1.060103  |
| 43 | 6 | 0 | 0.319859  | 2.689986  | 2.294028  |
| 44 | 6 | 0 | -0.455066 | -1.681231 | 3.093060  |
| 45 | 6 | 0 | -2.917504 | 1.072669  | -1.713985 |
| 46 | 6 | 0 | 0.982777  | 0.153355  | 3.407458  |
| 47 | 6 | 0 | -0.385814 | 0.639352  | 3.470610  |
| 48 | 6 | 0 | -1.887635 | 1.881298  | -2.345064 |
| 49 | 6 | 0 | -3.230481 | -1.211428 | -0.835463 |
| 50 | 6 | 0 | -3.450101 | -0.706106 | 0.446173  |
| 51 | 6 | 0 | -1.480034 | 2.908081  | -1.400018 |
| 52 | 6 | 0 | -2.257844 | 2.733147  | -0.184234 |
| 53 | 6 | 0 | -0.710425 | 1.881642  | 2.925261  |
| 54 | 6 | 0 | -1.937872 | 2.042302  | 2.162857  |
| 55 | 6 | 0 | -3.146518 | 1.599405  | -0.378594 |
| 56 | 6 | 0 | -1.274553 | -0.494540 | 3.275986  |
| 57 | 6 | 0 | -2.860205 | -1.366533 | 1.598956  |
| 58 | 6 | 0 | -3.407680 | 0.728179  | 0.679370  |
| 59 | 6 | 0 | -2.452230 | -0.340379 | 2.544381  |
| 60 | 6 | 0 | -2.790905 | 0.954231  | 1.976325  |

The total electronic energy was calculated to be -2286.2863809 Hartree.

**Table S2.** Optimized structure of H<sub>2</sub>O@C<sub>60</sub> (B3LYP-D3/6-31G(d,p))

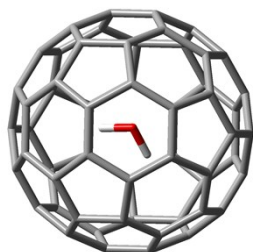

Standard orientation:

| Center Number | Atomic Number | Atomic Type | Coordinates (Angstroms) |           |           |
|---------------|---------------|-------------|-------------------------|-----------|-----------|
|               |               |             | X                       | Y         | Z         |
| 1             | 6             | 0           | 0.748422                | 1.273931  | -3.225400 |
| 2             | 6             | 0           | 1.202210                | -0.101812 | -3.336454 |
| 3             | 6             | 0           | 2.326313                | -0.524671 | -2.627911 |
| 4             | 6             | 0           | 3.043165                | 0.411547  | -1.778341 |
| 5             | 6             | 0           | 2.609362                | 1.734042  | -1.673663 |
| 6             | 6             | 0           | 1.437381                | 2.174261  | -2.412439 |
| 7             | 6             | 0           | 0.030326                | -0.956210 | -3.416975 |
| 8             | 6             | 0           | 2.325762                | -1.819529 | -1.969089 |
| 9             | 6             | 0           | 3.485379                | -0.305618 | -0.593629 |
| 10            | 6             | 0           | 2.597112                | 2.393537  | -0.377667 |
| 11            | 6             | 0           | 0.700831                | 3.105658  | -1.574246 |
| 12            | 6             | 0           | -0.704521               | 1.269425  | -3.236972 |
| 13            | 6             | 0           | 3.021060                | 1.704335  | 0.760800  |
| 14            | 6             | 0           | 3.475977                | 0.327291  | 0.650525  |
| 15            | 6             | 0           | 2.283166                | 1.834934  | 2.007248  |
| 16            | 6             | 0           | 3.019134                | -0.392044 | 1.828193  |
| 17            | 6             | 0           | 0.029111                | -2.197602 | -2.782668 |
| 18            | 6             | 0           | 3.041424                | -1.684376 | -0.711985 |
| 19            | 6             | 0           | 2.282362                | 0.539155  | 2.666140  |
| 20            | 6             | 0           | 2.602003                | -2.373413 | 0.418109  |
| 21            | 6             | 0           | 1.199657                | -2.638033 | -2.044103 |
| 22            | 6             | 0           | 1.416975                | 3.241328  | -0.316212 |
| 23            | 6             | 0           | -0.694691               | 3.101323  | -1.585372 |
| 24            | 6             | 0           | -1.150326               | -2.645099 | -2.062792 |

|    |   |   |           |           |           |
|----|---|---|-----------|-----------|-----------|
| 25 | 6 | 0 | -1.411953 | 2.165462  | -2.435203 |
| 26 | 6 | 0 | -1.147981 | -0.109084 | -3.355206 |
| 27 | 6 | 0 | -1.431700 | 3.232554  | -0.339016 |
| 28 | 6 | 0 | -2.592944 | 1.718001  | -1.715261 |
| 29 | 6 | 0 | -2.280708 | -0.538871 | -2.664766 |
| 30 | 6 | 0 | 2.589639  | -1.714219 | 1.712746  |
| 31 | 6 | 0 | 0.709539  | 3.366485  | 0.880678  |
| 32 | 6 | 0 | 0.743548  | -3.357246 | -0.867610 |
| 33 | 6 | 0 | -2.605447 | 2.377530  | -0.419299 |
| 34 | 6 | 0 | -3.016901 | 0.392865  | -1.826851 |
| 35 | 6 | 0 | -2.282669 | -1.833730 | -2.005980 |
| 36 | 6 | 0 | -3.019198 | -1.703082 | -0.760490 |
| 37 | 6 | 0 | -0.708741 | -3.361658 | -0.879217 |
| 38 | 6 | 0 | 1.430321  | -3.228347 | 0.338546  |
| 39 | 6 | 0 | 0.693787  | -3.097567 | 1.583447  |
| 40 | 6 | 0 | -3.473594 | -0.327110 | -0.649306 |
| 41 | 6 | 0 | -3.487993 | 0.305786  | 0.594861  |
| 42 | 6 | 0 | -3.045563 | -0.410771 | 1.779699  |
| 43 | 6 | 0 | -3.043338 | 1.685647  | 0.712304  |
| 44 | 6 | 0 | 1.151276  | 2.649474  | 2.065725  |
| 45 | 6 | 0 | -0.699933 | -3.101925 | 1.572313  |
| 46 | 6 | 0 | -0.744352 | 3.362021  | 0.869045  |
| 47 | 6 | 0 | -1.200588 | 2.642306  | 2.046976  |
| 48 | 6 | 0 | -1.415600 | -3.237159 | 0.315761  |
| 49 | 6 | 0 | 1.409915  | -2.161822 | 2.432732  |
| 50 | 6 | 0 | 0.704339  | -1.268935 | 3.238046  |
| 51 | 6 | 0 | -2.593749 | -2.389552 | 0.376535  |
| 52 | 6 | 0 | -2.606125 | -1.730277 | 1.671169  |
| 53 | 6 | 0 | -2.326343 | 1.820755  | 1.970398  |
| 54 | 6 | 0 | -2.328042 | 0.524959  | 2.629283  |
| 55 | 6 | 0 | -1.435341 | -2.170650 | 2.409979  |
| 56 | 6 | 0 | -0.029120 | 2.201852  | 2.786105  |
| 57 | 6 | 0 | 1.148255  | 0.109192  | 3.355009  |
| 58 | 6 | 0 | -0.748234 | -1.273432 | 3.226407  |
| 59 | 6 | 0 | -0.030294 | 0.956895  | 3.415510  |
| 60 | 6 | 0 | -1.202442 | 0.101943  | 3.336177  |
| 61 | 8 | 0 | 0.002014  | -0.160655 | -0.012679 |
| 62 | 1 | 0 | -0.766644 | 0.420978  | 0.023430  |
| 63 | 1 | 0 | 0.754628  | 0.440345  | 0.039942  |

The total electronic energy was calculated to be -2362.7374868 Hartree.

**Table S3.** Optimized structure of  $[\text{Li}^+\text{@C}_{60}](\text{PF}_6^-)$  (B3LYP-D3/6-31G(d,p))

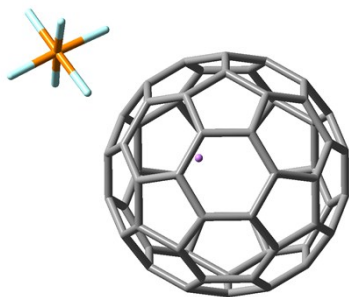

Standard orientation:

| Center Number | Atomic Number | Atomic Type | Coordinates (Angstroms) |           |           |
|---------------|---------------|-------------|-------------------------|-----------|-----------|
|               |               |             | X                       | Y         | Z         |
| 1             | 6             | 0           | 0.257158                | -1.199079 | -3.238380 |
| 2             | 6             | 0           | 0.653631                | -2.424524 | -2.561427 |
| 3             | 6             | 0           | -0.401519               | -2.786119 | -1.629109 |
| 4             | 6             | 0           | -1.451215               | -1.783530 | -1.727511 |
| 5             | 6             | 0           | -1.044826               | -0.803456 | -2.727328 |
| 6             | 6             | 0           | -2.281082               | 0.332446  | 1.032502  |
| 7             | 6             | 0           | -2.427064               | 0.035249  | -0.383416 |
| 8             | 6             | 0           | -2.132388               | -1.374764 | -0.581735 |
| 9             | 6             | 0           | -1.799458               | -1.950028 | 0.712745  |
| 10            | 6             | 0           | -1.890157               | -0.894803 | 1.712564  |
| 11            | 6             | 0           | 2.986562                | -1.618064 | -2.533705 |
| 12            | 6             | 0           | 3.939801                | -1.567801 | -1.436955 |
| 13            | 6             | 0           | 3.532733                | -2.546882 | -0.442384 |
| 14            | 6             | 0           | 2.327870                | -3.202178 | -0.924269 |
| 15            | 6             | 0           | 1.990229                | -2.628410 | -2.216355 |
| 16            | 6             | 0           | -0.417303               | 0.435188  | 3.188607  |
| 17            | 6             | 0           | -0.975706               | -0.843356 | 2.765011  |
| 18            | 6             | 0           | 0.074661                | -1.846159 | 2.864096  |
| 19            | 6             | 0           | 1.279143                | -1.188719 | 3.343466  |
| 20            | 6             | 0           | 0.975938                | 0.220128  | 3.542733  |
| 21            | 6             | 0           | -0.797806               | 1.614578  | 2.542807  |
| 22            | 6             | 0           | 0.198448                | 2.626283  | 2.224114  |
| 23            | 6             | 0           | -0.138317               | 3.201438  | 0.928571  |
| 24            | 6             | 0           | -1.348411               | 2.546386  | 0.445687  |
| 25            | 6             | 0           | -1.754209               | 1.561273  | 1.441948  |

|    |    |   |           |           |           |
|----|----|---|-----------|-----------|-----------|
| 26 | 6  | 0 | 1.214765  | -0.228928 | -3.544252 |
| 27 | 6  | 0 | 0.911991  | 1.178804  | -3.346428 |
| 28 | 6  | 0 | 2.116346  | 1.835066  | -2.861571 |
| 29 | 6  | 0 | 3.164219  | 0.831738  | -2.762278 |
| 30 | 6  | 0 | 2.607221  | -0.443347 | -3.183765 |
| 31 | 6  | 0 | -0.077794 | -3.336309 | -0.387582 |
| 32 | 6  | 0 | 1.314757  | -3.547210 | -0.028555 |
| 33 | 6  | 0 | 1.464943  | -3.250596 | 1.387097  |
| 34 | 6  | 0 | 0.165373  | -2.855394 | 1.904239  |
| 35 | 6  | 0 | -0.789823 | -2.908226 | 0.807116  |
| 36 | 6  | 0 | -1.335850 | 0.550078  | -2.539021 |
| 37 | 6  | 0 | -2.047140 | 0.978067  | -1.340571 |
| 38 | 6  | 0 | -1.491665 | 2.257838  | -0.919924 |
| 39 | 6  | 0 | -0.432163 | 2.617735  | -1.855934 |
| 40 | 6  | 0 | -0.339016 | 1.562083  | -2.855848 |
| 41 | 6  | 0 | 0.875882  | 3.544001  | 0.028485  |
| 42 | 6  | 0 | 2.268866  | 3.327372  | 0.387289  |
| 43 | 6  | 0 | 2.979093  | 2.898349  | -0.807195 |
| 44 | 6  | 0 | 2.026699  | 2.848155  | -1.905046 |
| 45 | 6  | 0 | 0.726041  | 3.247095  | -1.389235 |
| 46 | 6  | 0 | 4.233789  | -0.987305 | 1.336480  |
| 47 | 6  | 0 | 3.522958  | -0.558014 | 2.529993  |
| 48 | 6  | 0 | 2.526680  | -1.568594 | 2.846725  |
| 49 | 6  | 0 | 2.621820  | -2.621492 | 1.849318  |
| 50 | 6  | 0 | 3.677191  | -2.262862 | 0.916129  |
| 51 | 6  | 0 | 3.982693  | 1.933781  | -0.711424 |
| 52 | 6  | 0 | 4.320400  | 1.359863  | 0.581048  |
| 53 | 6  | 0 | 4.624417  | -0.047825 | 0.381840  |
| 54 | 6  | 0 | 4.474898  | -0.344060 | -1.033231 |
| 55 | 6  | 0 | 4.078025  | 0.880400  | -1.709080 |
| 56 | 6  | 0 | 1.933126  | 1.190776  | 3.238414  |
| 57 | 6  | 0 | 3.233021  | 0.793060  | 2.722185  |
| 58 | 6  | 0 | 3.640053  | 1.771937  | 1.727343  |
| 59 | 6  | 0 | 2.591845  | 2.775017  | 1.628140  |
| 60 | 6  | 0 | 1.537598  | 2.415921  | 2.563656  |
| 61 | 3  | 0 | -0.232391 | 0.572936  | -0.001334 |
| 62 | 15 | 0 | -5.735905 | -0.001978 | 0.000574  |
| 63 | 9  | 0 | -4.801035 | -0.391329 | -1.316303 |
| 64 | 9  | 0 | -6.636094 | -1.322550 | -0.251042 |
| 65 | 9  | 0 | -6.578255 | 0.385797  | 1.326382  |
| 66 | 9  | 0 | -6.692156 | 0.898524  | -0.943143 |
| 67 | 9  | 0 | -4.692132 | -0.904329 | 0.935923  |
| 68 | 9  | 0 | -4.748339 | 1.311492  | 0.249780  |

The total electronic energy was calculated to be  $-3234.3902244$  Hartree.



## Reference

- [1] Y. Isshiki, S. Fujii, T. Nishino and M. Kiguchi, *J. Am. Chem. Soc.*, 2018, **140**, 3760.
- [2] M. D. Segall, J. D. L. Philip, M. J. Probert, C. J. Pickard, P. J. Hasnip, S. J. Clark. *et al. J. Phys. Cond. Matter.*, 2002, **14**, 2717–2744.
- [3] J. P. Perdew, K. Burke and M. Ernzerhof, *Phys. Rev. Lett.*, 1996, **77**, 3865–3868.
- [4] A. Tkatchenko and M. Scheffler, *Phys. Rev. Lett.*, 2009, **102**, 073005.
- [5] H. J. Monkhorst, *Phys. Rev. B*, 1976, **13**, 5188–5192.
